# Supplementary material for: ClipKIT: A multiple sequence alignment trimming software for accurate phylogenomic inference
Source: PLoS Biol. 2020 Dec 2;18(12):e3001007. doi: 10.1371/journal.pbio.3001007 (PMC7735675; doi:10.1371/journal.pbio.3001007)
Supplement: S1 Table — Simulated NT alignments were generated using this substitution rate matrix. GTR, general time reversible; NT, nucleotide. (XLSX) [file pbio.3001007.s014.xlsx]

## Sheet: Sheet1
# S1 Table. GTR substitution rate matrix.
	T	C	A	G
T	-	0.2	0.4	0.6
C	0.2	-	0.8	1.2
A	0.4	0.8	-	1
G	0.6	1.2	1	-
